# Supplementary material
Source: publisher figshare collection journal article supplement (https://frontiersin.figshare.com/ndownloader/files/22043715)
Supplement: Supplementary file 1 [file 22043715]

Table 2. Tidal datum from Pattani gauging station showing the average of daily water level during 2015 to 2017.

| Year | Month | Mean sea level (m) | Mean high water (m) | Mean low water (m) | Range  (m) |
| --- | --- | --- | --- | --- | --- |
| 2015 | Jan | 2.834 | 3.061 | 2.607 | 0.454 |
|  | Feb | 2.738 | 2.983 | 2.519 | 0.464 |
|  | Mar | 2.657 | 2.905 | 2.428 | 0.477 |
|  | Apr | 2.644 | 2.894 | 2.403 | 0.491 |
|  | May | 2.476 | 2.738 | 2.264 | 0.474 |
|  | Jun | 2.450 | 2.688 | 2.249 | 0.439 |
|  | Jul | 2.420 | 2.647 | 2.200 | 0.447 |
|  | Aug | 2.444 | 2.710 | 2.204 | 0.506 |
|  | Sep | 2.485 | 2.747 | 2.240 | 0.507 |
|  | Oct | 2.667 | 2.938 | 2.426 | 0.512 |
|  | Nov | 2.758 | 3.010 | 2.521 | 0.489 |
|  | Dec | 2.850 | 3.080 | 2.634 | 0.446 |
| 2016 | Jan | 2.797 | 3.040 | 2.578 | 0.462 |
|  | Feb | 2.881 | 3.133 | 2.646 | 0.487 |
|  | Mar | 2.710 | 2.943 | 2.499 | 0.444 |
|  | Apr | 2.570 | 2.833 | 2.361 | 0.472 |
|  | May | 2.539 | 2.798 | 2.328 | 0.470 |
|  | Jun | 2.441 | 2.691 | 2.242 | 0.449 |
|  | Jul | 2.466 | 2.725 | 2.228 | 0.497 |
|  | Aug | 2.428 | 2.659 | 2.252 | 0.407 |
|  | Sep | 2.476 | 2.726 | 2.260 | 0.466 |
|  | Oct | 2.530 | 2.769 | 2.311 | 0.458 |
|  | Nov | 2.760 | 3.015 | 2.518 | 0.497 |
|  | Dec | 2.896 | 3.141 | 2.639 | 0.502 |
| 2017 | Jan | 2.935 | 3.170 | 2.698 | 0.472 |
|  | Feb | 2.837 | 3.079 | 2.628 | 0.451 |
|  | Mar | 2.718 | 2.985 | 2.490 | 0.495 |
|  | Apr | 2.680 | 2.975 | 2.412 | 0.563 |
|  | May | 2.601 | 2.866 | 2.372 | 0.494 |
|  | Jun | 2.510 | 2.753 | 2.313 | 0.440 |
|  | Jul | 2.505 | 2.744 | 2.301 | 0.443 |
|  | Aug | 2.534 | 2.765 | 2.307 | 0.458 |
|  | Sep | 2.534 | 2.765 | 2.307 | 0.458 |
|  | Oct | 2.764 | 3.006 | 2.514 | 0.492 |
|  | Nov | 2.926 | 3.178 | 2.645 | 0.533 |
|  | Dec | 2.998 | 3.258 | 2.736 | 0.522 |

Data source: The Marine Department, Ministry of Transport (https://www.md.go.th)
